# Supplementary material for: Wide blue phase range observed in simple binary mixture systems containing rodlike racemic biphenyl mesogens with 2-octyloxy tails
Source: Royal Society of Chemistry journal article supplement (doi:10.1039/c6ra20799e), 2016-01-01
Supplement: c6ra20799e1.pdf [file c6ra20799e1.pdf]

**Wide blue phase range observed in simple binary mixture  
systems containing rodlike racemic biphenyl mesogens with  
2-octyloxy tail**

Chiung-Cheng Huang,\*<sup>a</sup> Chang-Yi Guo,<sup>a</sup> Wei-Cheng Hsieh,<sup>a</sup> Chih-Yi  
Fang,<sup>a</sup> Jian-Fu Chiou,<sup>a</sup> Mei-Ching Yu,<sup>a</sup> Bo-Hao Chen,<sup>b</sup> I-Jui Hsu\*<sup>b</sup> and  
Jey-Jau Lee<sup>c</sup>

*<sup>a</sup>Department of Chemical Engineering, Tatung University, Taipei 104, Taiwan*

*E-mail: chchhuang@ttu.edu.tw*

*<sup>b</sup>Department of Molecular Science and Engineering, National Taipei University of*

*Technology, Taipei 106, Taiwan*

*E-mail: ijuihsu@ntut.edu.tw*

*Department of Chemical Engineering, Tatung University, Taipei 104, Taiwan.*

*<sup>c</sup>National Synchrotron Radiation Research Center of Taiwan, Hsinchu 300, Taiwan*

**Electronic supplementary information (ESI)**

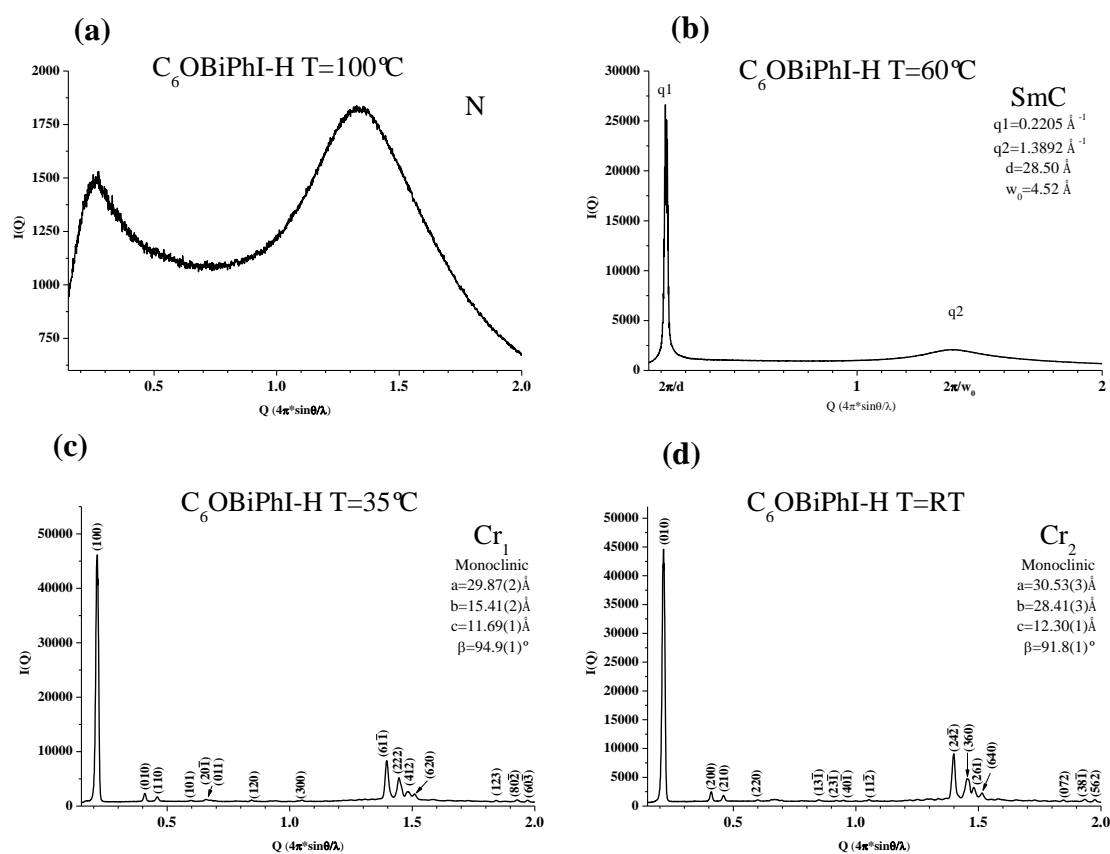

**Fig. S1** The variable-temperature XRD measurements of biphenyl mesogen  $C_6OBiPhI-H$

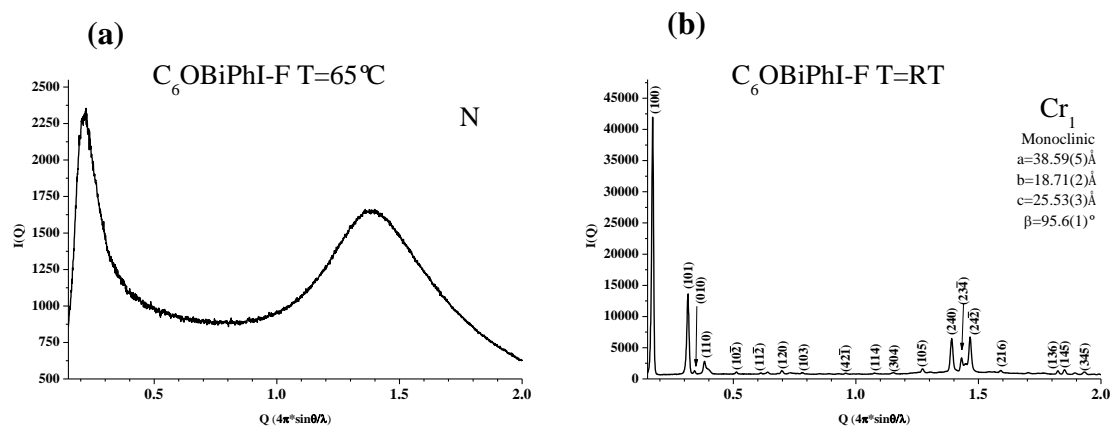

**Fig. S2** The variable-temperature XRD measurements of biphenyl mesogen  $C_6OBiPhI-F$

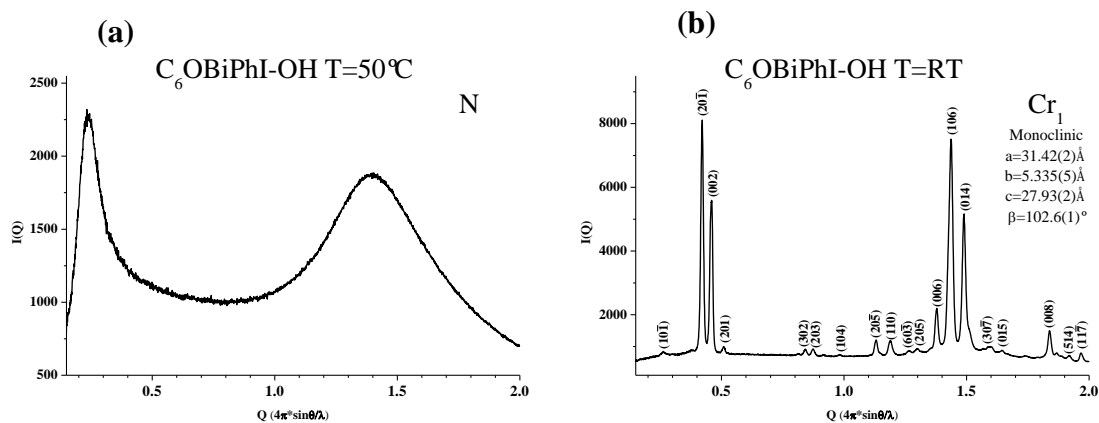

**Fig. S3** The variable-temperature XRD measurements of biphenyl mesogen  $C_6OBiPhI-OH$

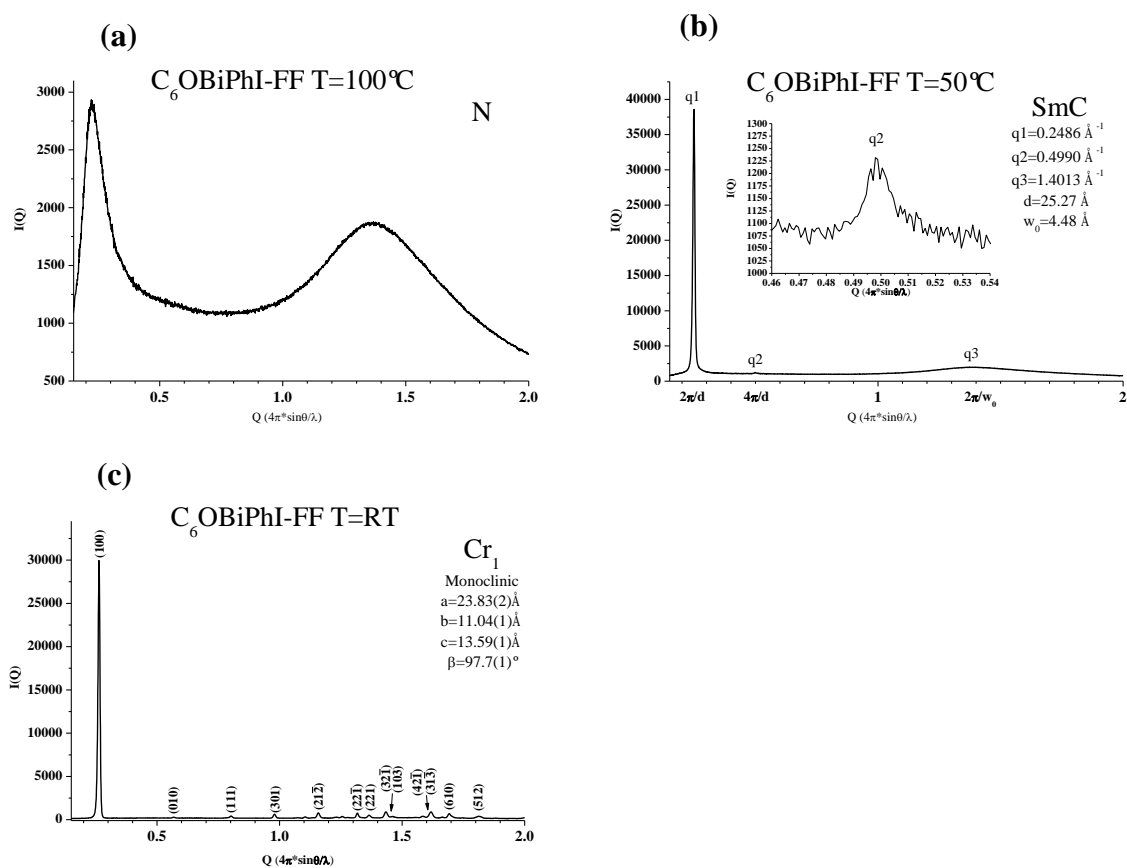

**Fig. S4** The variable-temperature XRD measurements of biphenyl mesogen  $C_6OBiPhI-FF$

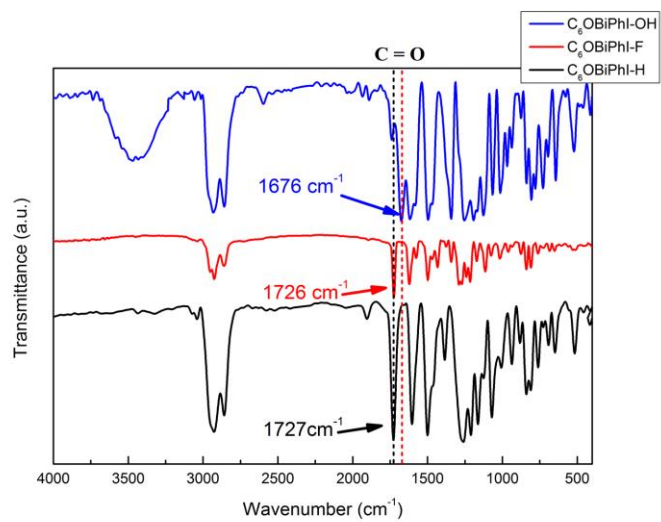

**Fig. S5** FT-IR spectra of the biphenyl compounds  $C_6OBiPhI-H$ ,  $C_6OBiPhI-F$  and  $C_6OBiPhI-OH$ .

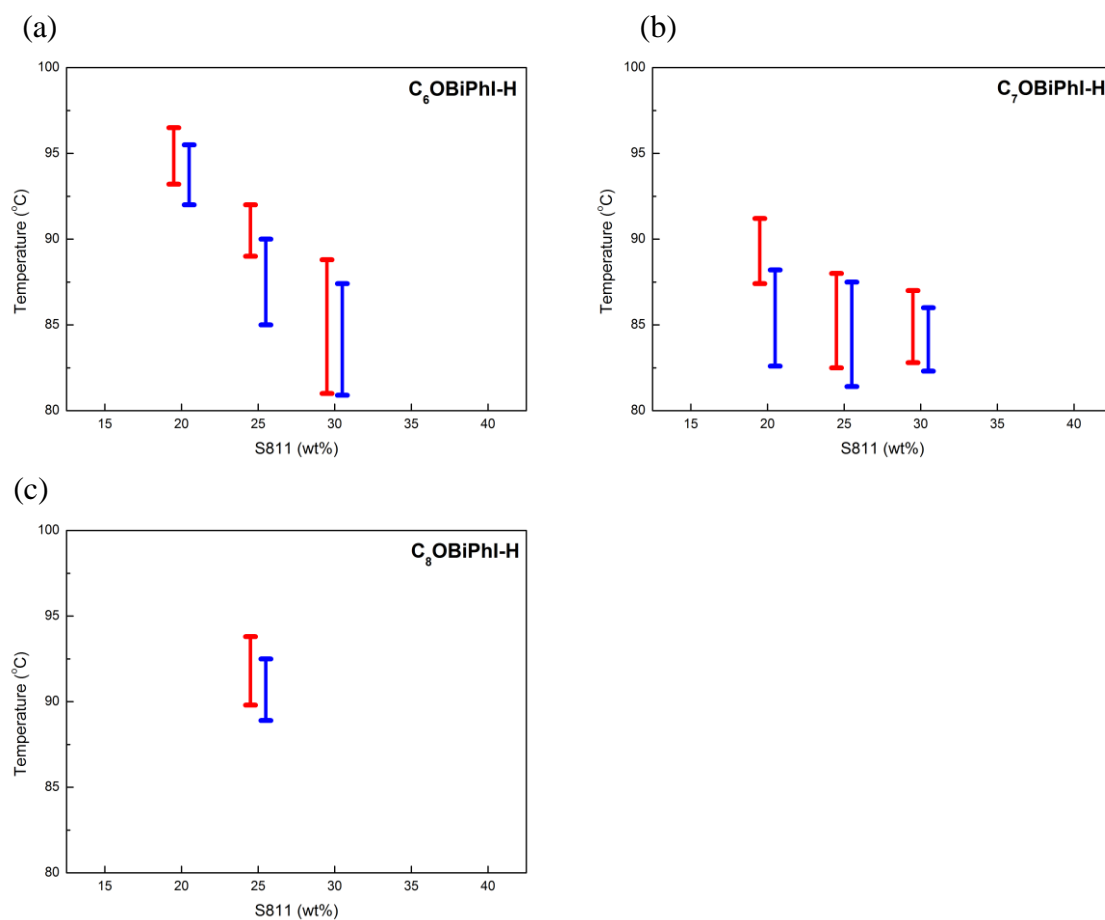

**Fig. S6** The comparison of BP temperature range for the blending mixture system composed of **C<sub>n</sub>OBiPhI-H** and different amount of chiral dopant **S811** in heating (red line) and cooling processes (blue line).

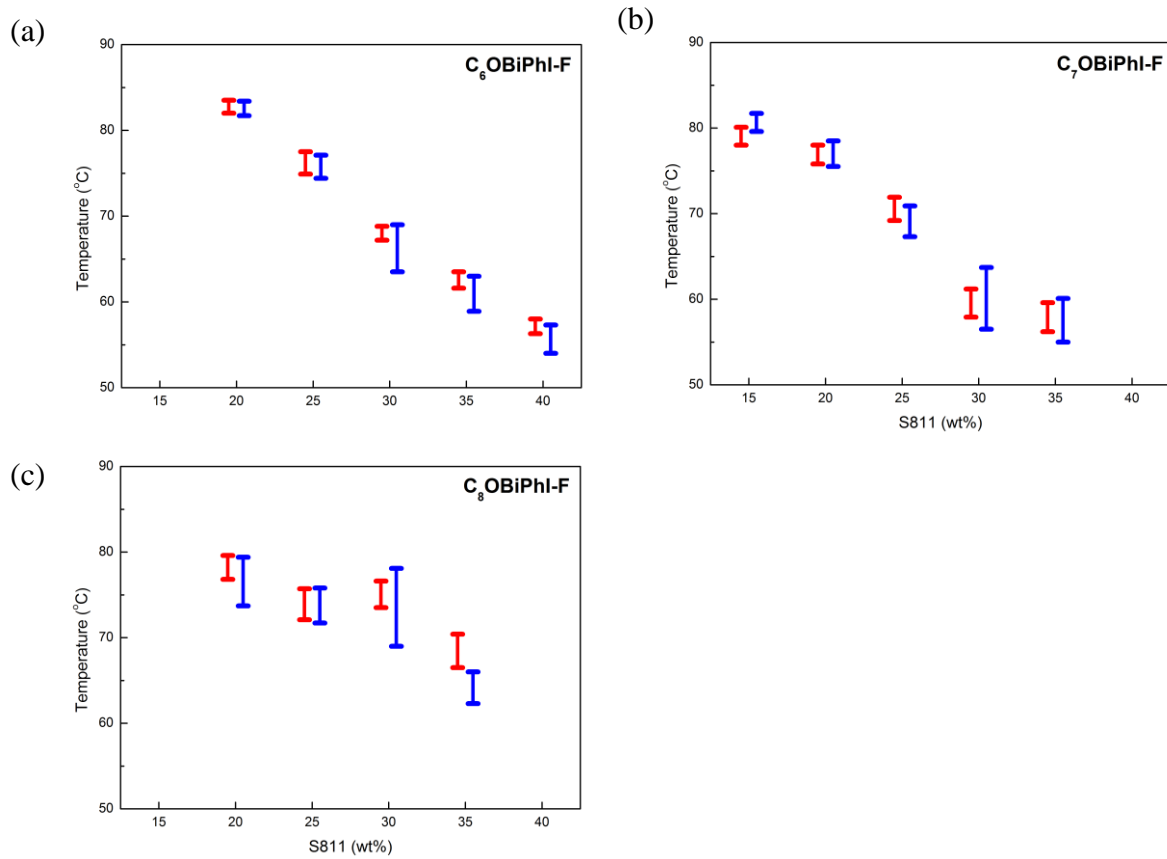

**Fig. S7** The comparison of BP temperature range for the blending mixture system composed of  $C_nOBiPhI-F$  and different amount of chiral dopant **S811** in heating (red line) and cooling processes (blue line).

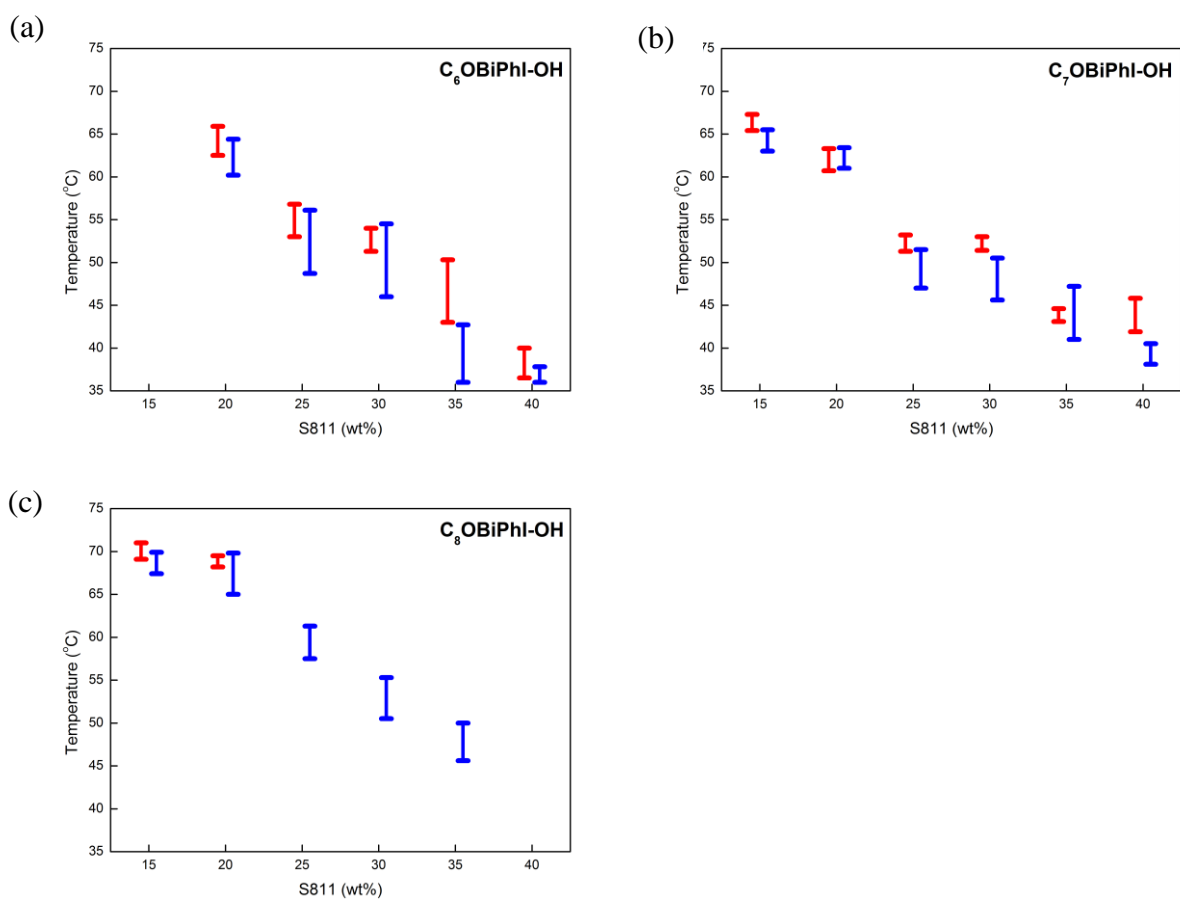

**Fig. S8** The comparison of BP temperature range for the blending mixture system composed of  $C_n$ OBiPhI-OH and different amount of chiral dopant S811 in heating (red line) and cooling processes (blue line).

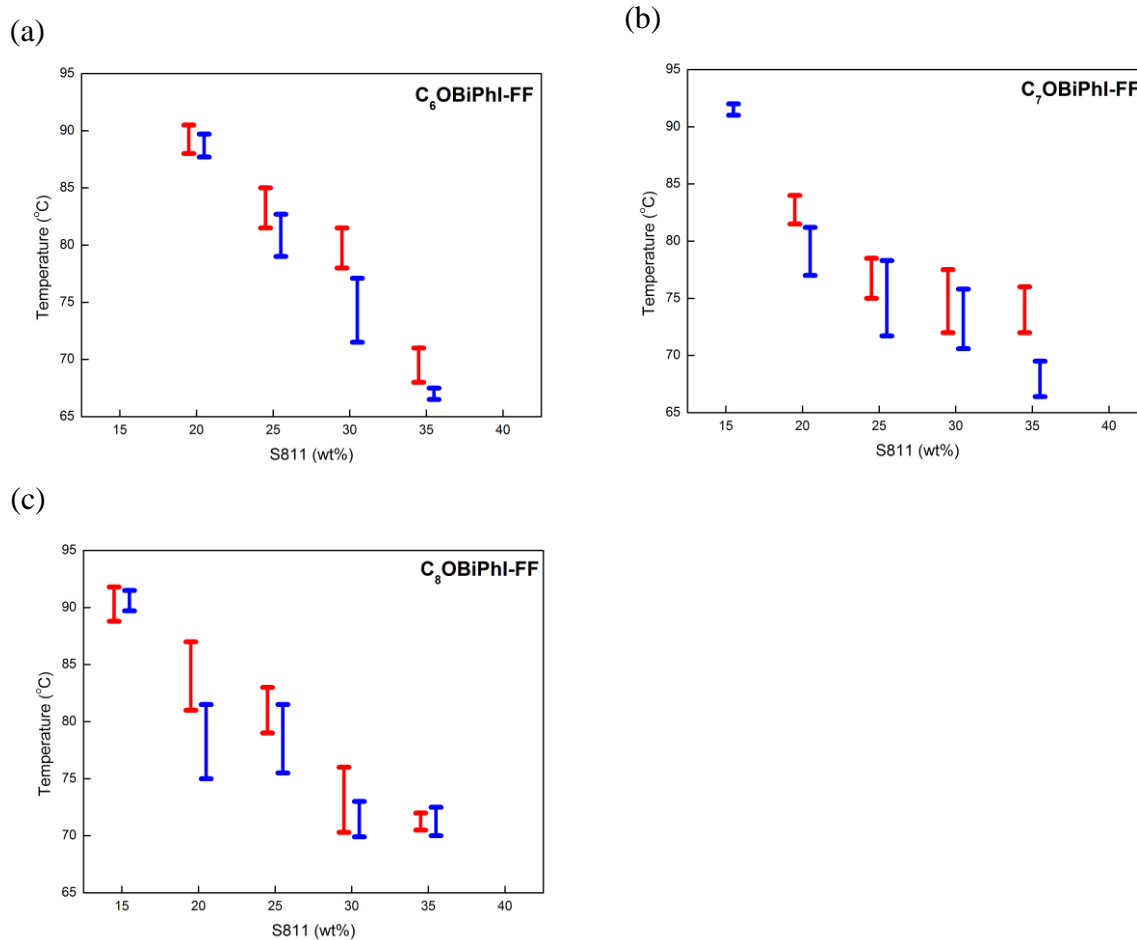

**Fig. S9** The comparison of BP temperature range for the blending mixture system composed of  $C_n\text{OBiPhI-FF}$  and different amount of chiral dopant **S811** in heating (red line) and cooling processes (blue line).

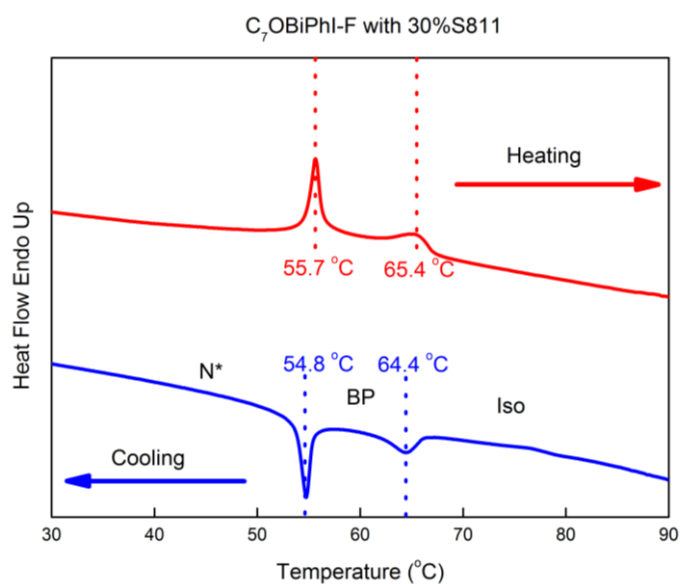

**Fig. S10** DSC curves of  $C_7\text{OBiPhI-F}$  blended with 30.0 wt% **S811** (with rate of 1 °C/min upon heating and cooling).



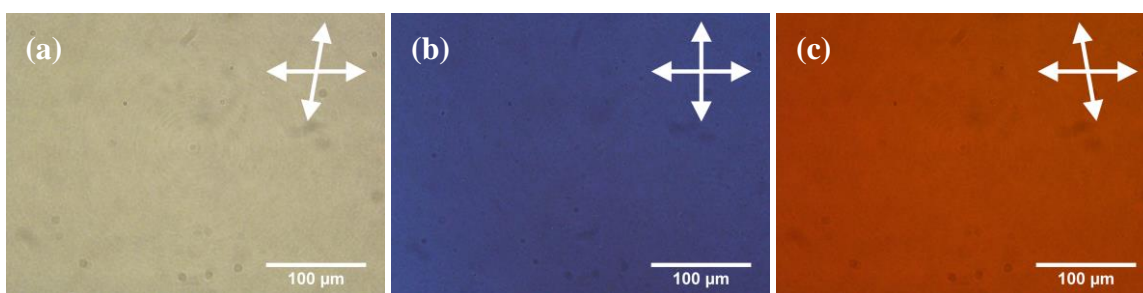

**Fig. S11** Optical images of **C<sub>7</sub>OBiPhI-OH** blended with 35.0 wt% **S811** were observed by POM at 46.0 °C (a) polarizer was rotated clockwise by a small angle of 10°. (b) Polarizer and analyzer were orthogonal. (c) Polarizer was rotated counterclockwise by a small angle of 10°.

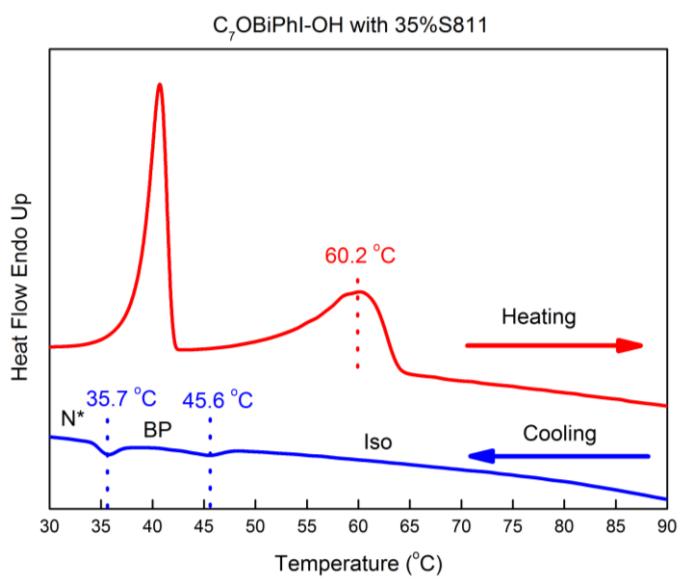

**Fig. S12** DSC curves of **C<sub>7</sub>OBiPhI-OH** blended with 35.0 wt% **S811** (with rate of 1 °C/min upon heating and cooling).

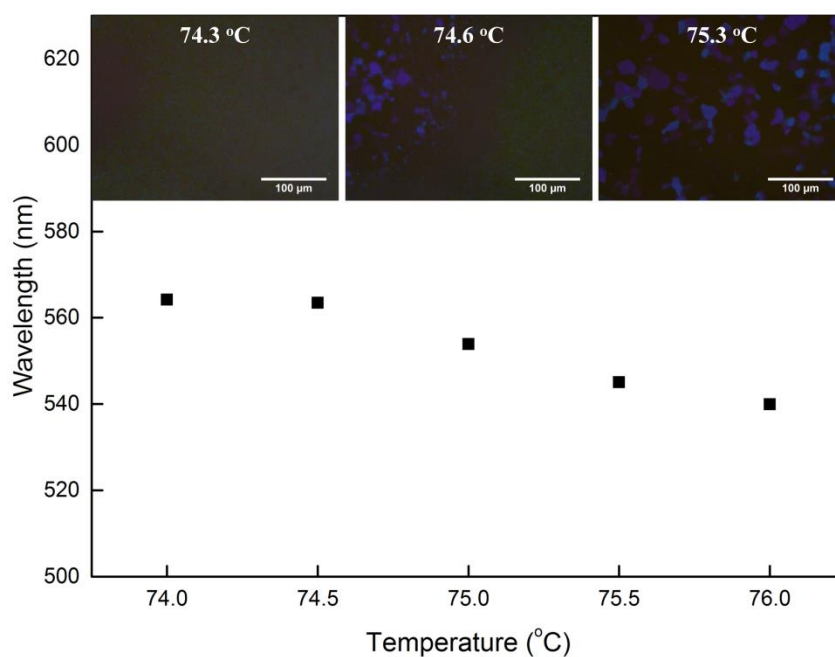

**Fig. S13** The temperature dependence of the Bragg reflection wavelength for the blending mixture consisting of **C<sub>8</sub>OBiPhI-F** + 30% **S811** during the heating process with a rate of 0.2 °C min<sup>-1</sup>. The inset shows the POM images of BPs at different temperature.

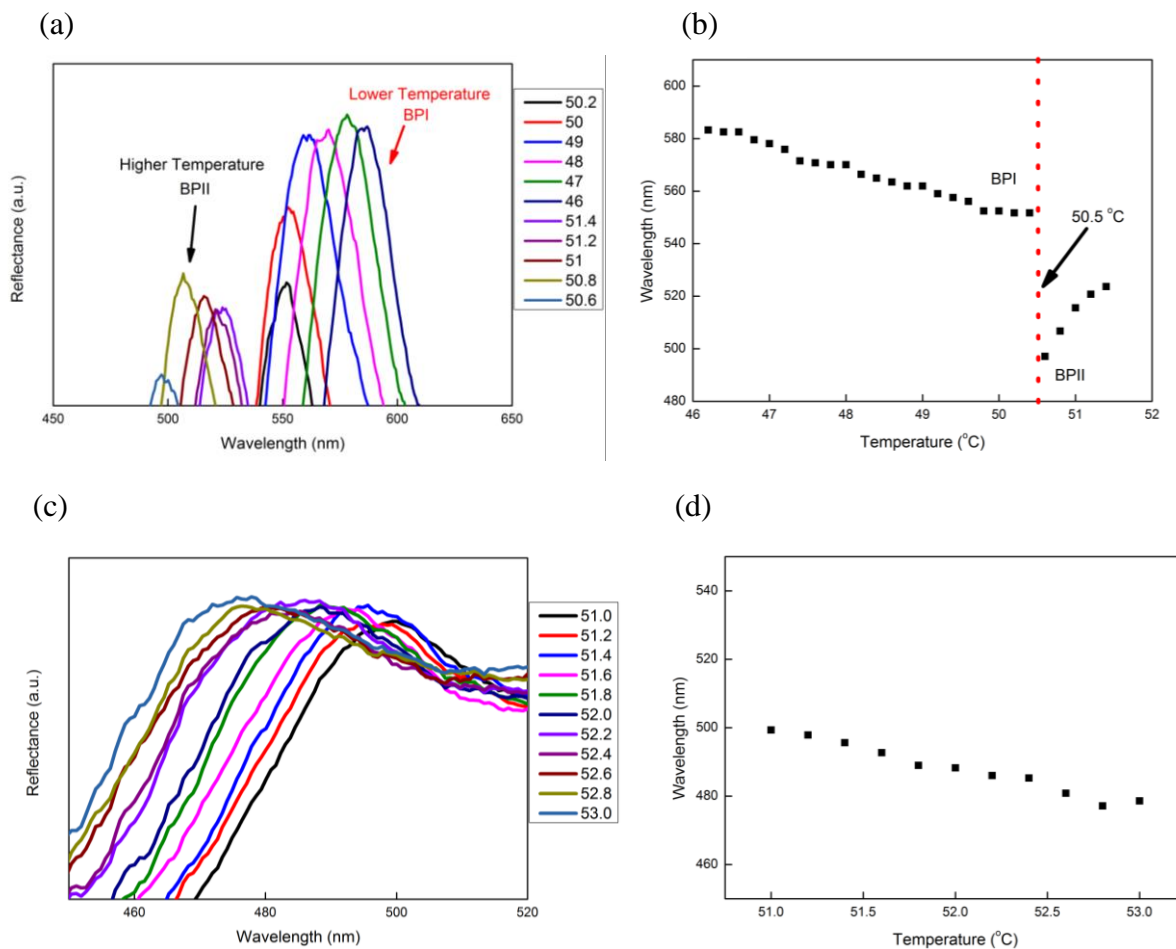

**Fig. S14** For the blending mixture consisting of C<sub>7</sub>OBiPhI-OH + 25% S811 during the cooling process (a) Temperature dependence of typical reflectance profile, and during the heating process(c); (b) Temperature dependence of the Bragg reflection wavelength during the cooling process and, during the heating process (d) with a rate of 0.2 °C min<sup>-1</sup>.

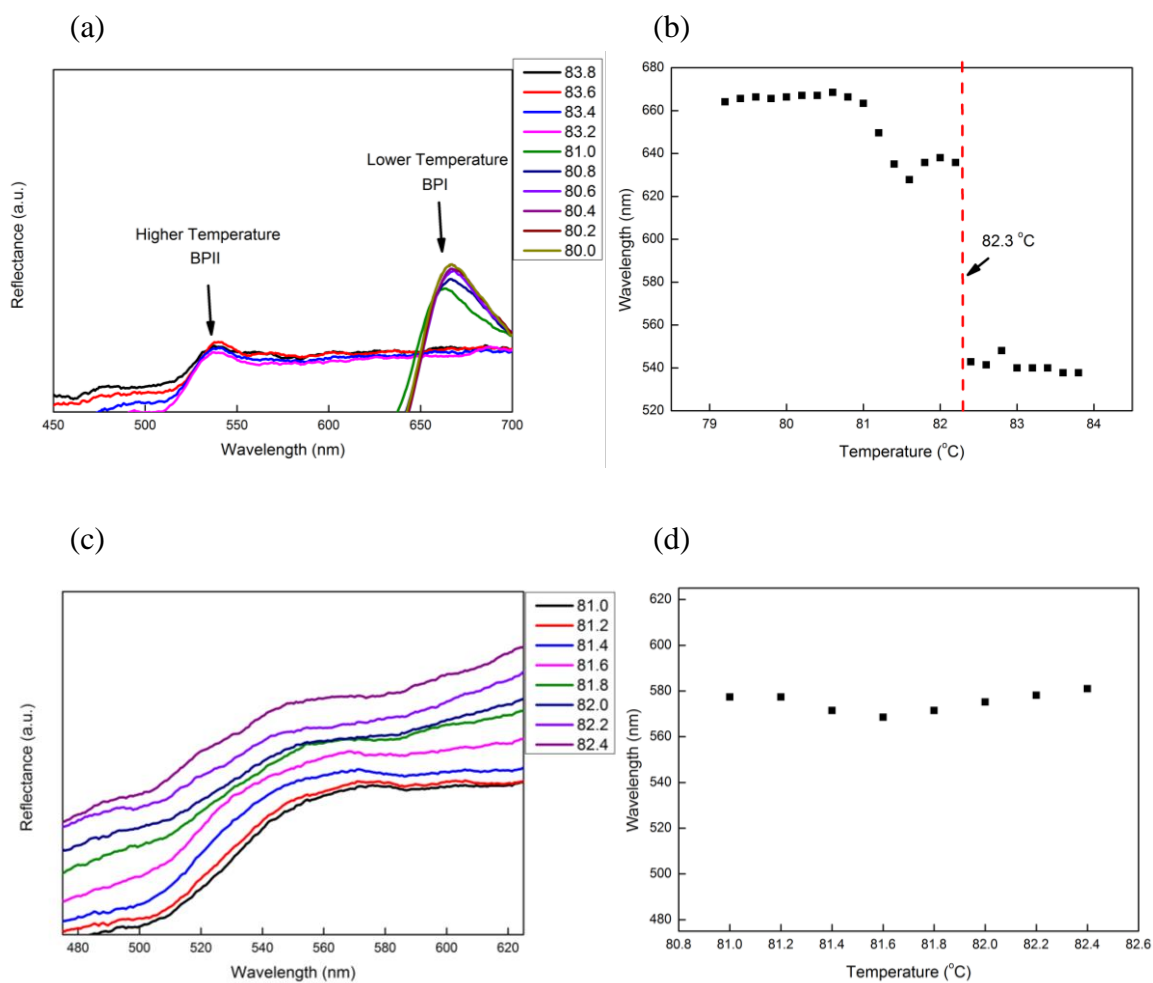

**Fig. S15** (a) Temperature dependence of typical reflectance profile during the cooling process and (c) during the heating process; (b) Temperature dependence of the Bragg reflection wavelength during the cooling process and (d) during the heating process for the blending mixture consisting of C<sub>6</sub>OBiPhI-FF + 25% S811. (with a rate of 0.2 °C min<sup>-1</sup>)

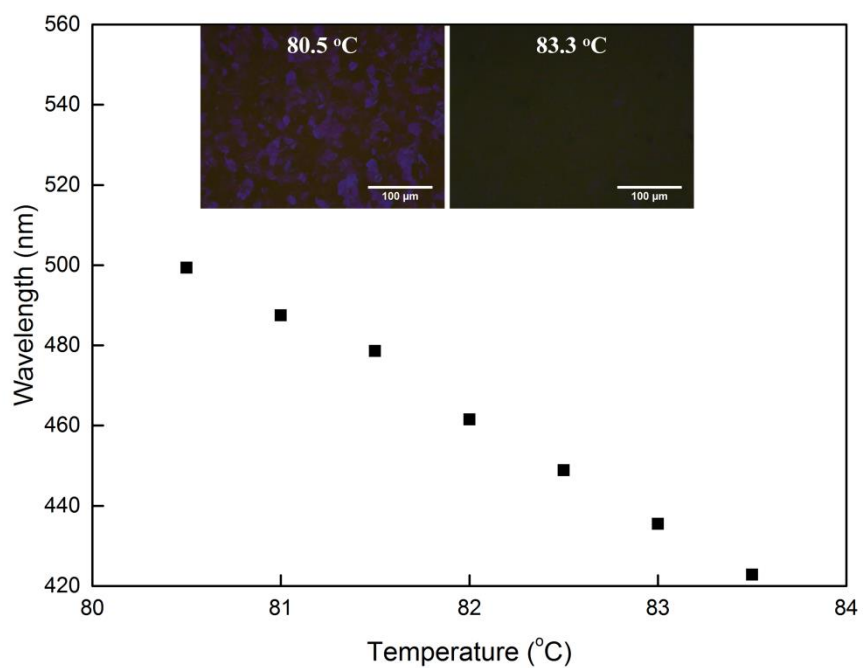

**Fig. S16** The temperature dependence of the Bragg reflection wavelength for the blending mixture consisting of **C<sub>8</sub>OBiPhI-F** + 10% **ISO(6OBA)<sub>2</sub>** during the cooling process with a rate of 0.2 °C min<sup>-1</sup>. The inset shows the POM images of BPs at different temperature.

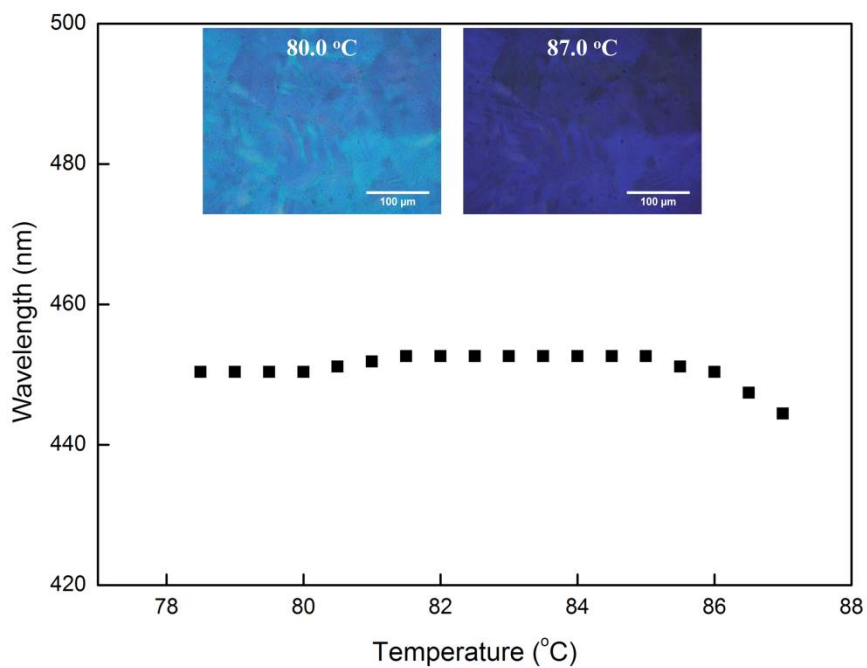

**Fig. S17** The temperature dependence of the Bragg reflection wavelength for the blending mixture consisting of  $C_8OBiPhI-FF$  + 10%  $ISO(6OBA)_2$  during the cooling process with a rate of  $0.2 \text{ } ^\circ\text{C min}^{-1}$ . The inset shows the POM images of BPs at different temperature.

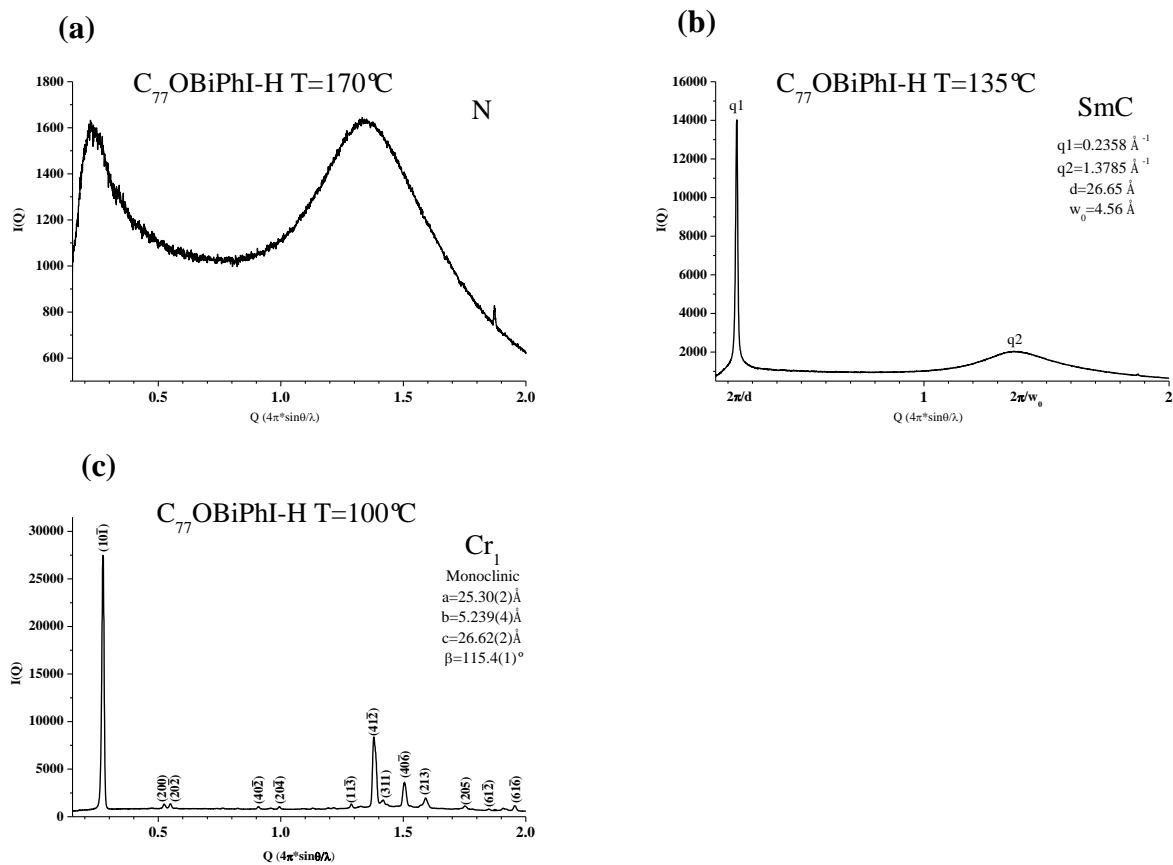

**Fig. S18** The variable-temperature XRD measurements of biphenyl mesogen  $C_6OBiPhI-FF$

(a)

HOMO

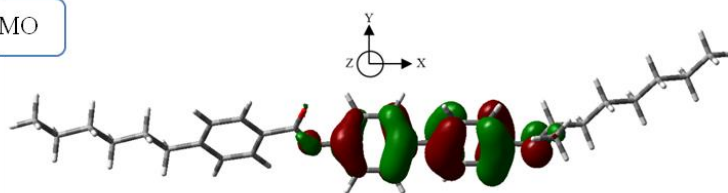

C<sub>6</sub>OBiPhI-H

LUMO

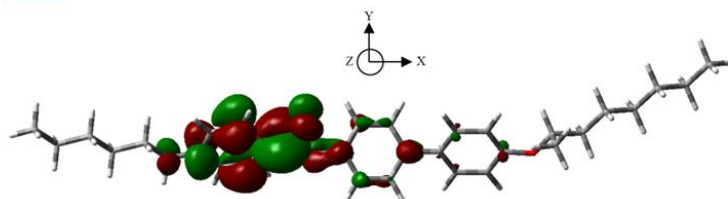

(b)

HOMO

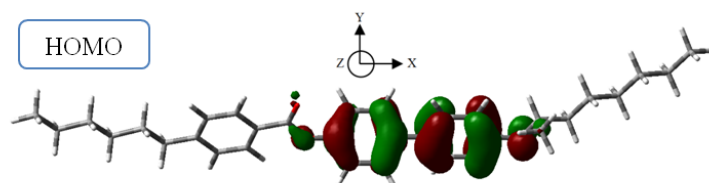

C<sub>6</sub>OBiPhI-F

LUMO

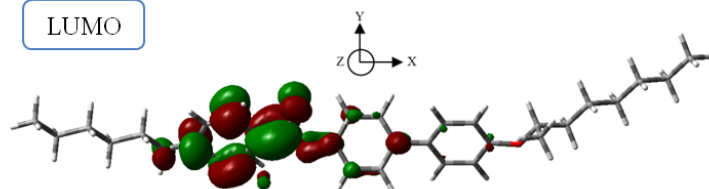



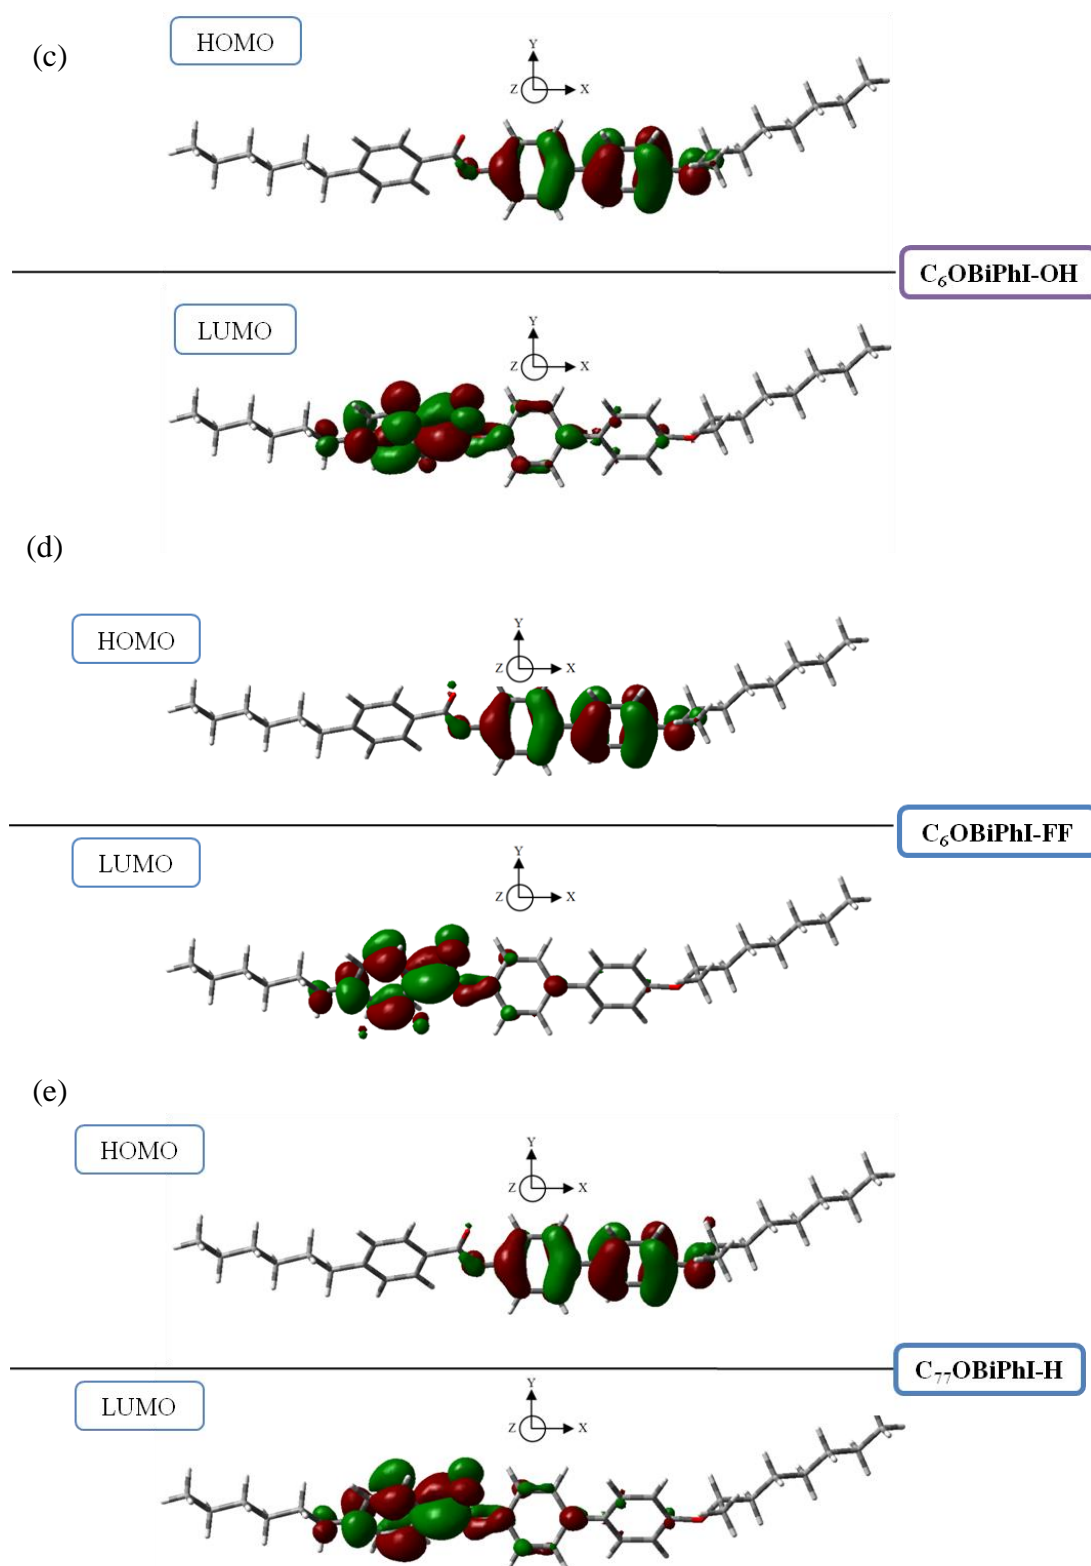

**Fig. S19** The HOMO and LUMO of compound (a) C<sub>6</sub>OBiPhI-H (b) C<sub>6</sub>OBiPhI-F (c) C<sub>6</sub>OBiPhI-OH (d) C<sub>6</sub>OBiPhI-FF (e) C<sub>77</sub>OBiPhI-H. The simulation exchange functional and basis set are CAM-B3LYP and 6-311G(d, p), respectively. The isosurface is drawn at value of 0.02

**Table S1.** DFT calculated HOMO, LUMO, energy gap, dipole moment components,  $\mu_x$ ,  $\mu_y$ ,  $\mu_z$  and modulus ( $\mu$ ) for the biphenyl compounds.

| Compound                      | Energy (eV) |         |                 | Dipole moment (m in Debye) |         |         |                      |
|-------------------------------|-------------|---------|-----------------|----------------------------|---------|---------|----------------------|
|                               | HOMO        | LUMO    | $\Delta E$ (eV) | $\mu_x$                    | $\mu_y$ | $\mu_z$ | $\mu_{\text{total}}$ |
| <b>C<sub>6</sub>OBiPhI-H</b>  | -7.0074     | 0.0123  | 7.0196          | -1.4837                    | 0.5665  | 0.3023  | 1.6166               |
| <b>C<sub>6</sub>OBiPhI-F</b>  | -6.9789     | -0.1483 | 6.8306          | -2.3668                    | 1.1911  | 0.9564  | 2.8170               |
| <b>C<sub>6</sub>OBiPhI-OH</b> | -7.1621     | -0.0172 | 7.1449          | 0.5034                     | 1.2278  | 1.3010  | 1.8584               |
| <b>C<sub>6</sub>OBiPhI-FF</b> | -7.0240     | -0.2903 | 6.7337          | -1.7324                    | 2.2723  | 1.6355  | 3.2923               |
| <b>C<sub>77</sub>OBiPhI-H</b> | -7.0492     | 0.0023  | 7.0515          | -1.5766                    | 0.4402  | 0.2524  | 1.6562               |
